# Supplementary material for: Early Peanut Immunotherapy in Children (EPIC) trial: protocol for a pragmatic randomised controlled trial of peanut oral immunotherapy in children under 5 years of age
Source: PubMed Central journal article supplement — BMJ Paediatr Open. 2023 Nov 14;7(1):e002294. doi: 10.1136/bmjpo-2023-002294 (PMC10649730; doi:10.1136/bmjpo-2023-002294), 2023-11-14
Supplement: bmjpo-2023-002294.reviewer_comments.pdf [file bmjpo-2023-002294.reviewer_comments.pdf]

## PEER REVIEW HISTORY

BMJ Paediatrics Open publishes all reviews undertaken for accepted manuscripts. Reviewers are asked to complete a checklist review form and are provided with free text boxes to elaborate on their assessment. These free text comments are reproduced below.

## ARTICLE DETAILS

|                            |                                                                                                                                                                         |
|----------------------------|-------------------------------------------------------------------------------------------------------------------------------------------------------------------------|
| <b>TITLE (PROVISIONAL)</b> | Early Peanut Immunotherapy in Children (EPIC) trial: Protocol for a pragmatic randomised controlled trial of peanut oral immunotherapy in children under 5 years of age |
| <b>AUTHORS</b>             | O'Sullivan, Michael David<br>Bear, Natasha<br>Metcalf, Jessica                                                                                                          |

This article was not externally reviewed at BMJ Paediatrics Open. Protocols that have been independently assessed prior to submission to BMJ Paediatrics Open are usually fast-tracked to publication on the grounds that further substantial changes will not be possible. This independent assessment will usually be external, independent review for both a substantial grant award from a non-commercial or government funder and ethics approval.
